# Supplementary material for: Bimetallic sulfide/N-doped carbon composite derived from Prussian blue analogues/cellulose nanofibers film toward enhanced oxygen evolution reaction
Source: Royal Society of Chemistry journal article supplement (doi:10.1039/d3dt04336c), 2024-01-01
Supplement: d3dt04336c1.pdf [file d3dt04336c1.pdf]

## Supporting Information

### **Bimetallic sulfide/N-doped carbon composites derived from Prussian blue analogues/cellulose nanofibers (PBA/CNFs) film toward enhanced oxygen evolution reaction**

Zhengping Li <sup>a, \*</sup>, Feiyang Chen <sup>a</sup>, Chunlong Li <sup>a</sup>, Zhiliang Zhang <sup>a</sup>, Fangong Kong <sup>a</sup>, Xipeng Pu <sup>b</sup> and Qifang Lu <sup>c</sup>

<sup>a</sup> State Key Laboratory of Biobased Material and Green Papermaking, Qilu University of Technology (Shandong Academy of Sciences), Jinan, 250353, People's Republic of China

<sup>b</sup> School of Materials Science and Engineering, Shandong Provincial Key Laboratory of Chemical Energy Storage and Novel Cell Technology, Liaocheng University, Liaocheng 252000, People's Republic of China

<sup>c</sup> Key Laboratory of Processing and Testing Technology of Glass and Functional Ceramics of Shandong Province, School of Material Science and Engineering, Qilu University of Technology (Shandong Academy of Sciences), Jinan 250353, People's Republic of China

\* Email: knje@163.com

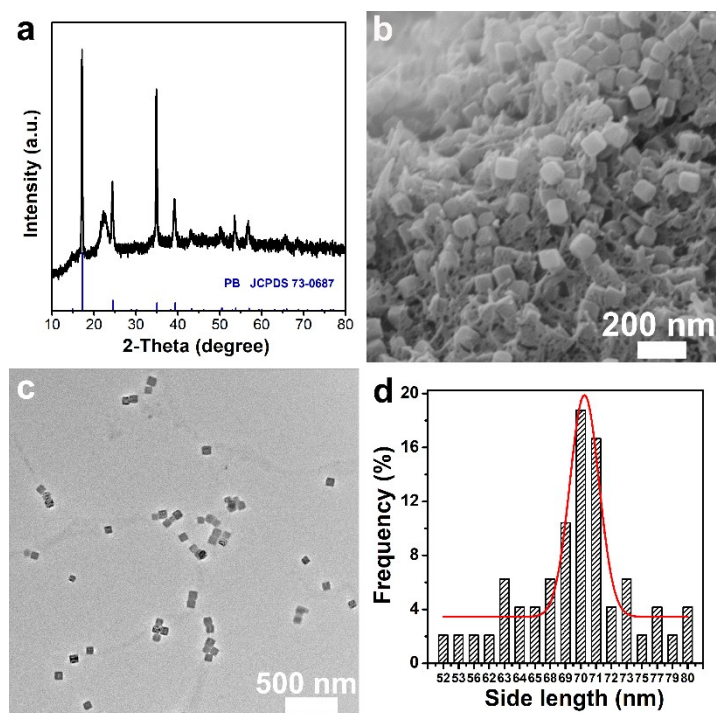

**Fig. S1.** a) XRD result, b) SEM and c) TEM image of NiFe-PBA/CNFs film, d) histograms of size distribution of NiFe-PBA NPs in NiFe-PBA/CNFs film.

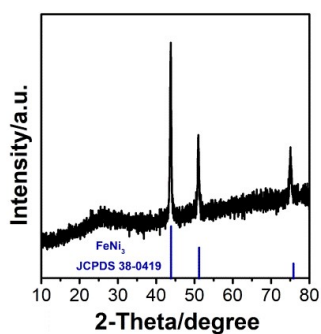

**Fig. S2.** XRD result of NiFe-alloy/NC composite.

**Table S1** Elemental composition of Ni and Fe determined by ICP-OES

| Samples                                                 | Ni content (mg/L) | Fe content (mg/L) | Ni/Fe molar ratio |
|---------------------------------------------------------|-------------------|-------------------|-------------------|
| $\text{Fe}_{0.4}\text{Ni}_{0.6}\text{S}_2/\text{NC-DF}$ | 9.069             | 6.092             | 1.416             |
| $\text{Fe}_{0.4}\text{Ni}_{0.6}\text{S}_2/\text{NC-DA}$ | 13.90             | 9.009             | 1.468             |
| $\text{Fe}_{0.4}\text{Ni}_{0.6}\text{S}/\text{NC NPs}$  | 22.72             | 15.36             | 1.407             |

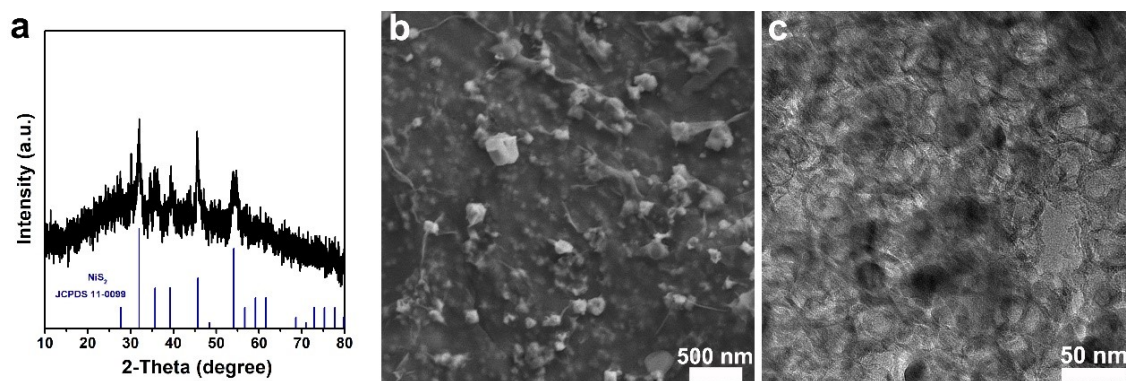

**Fig. S3.** a) XRD result, b) SEM and c) TEM image of  $\text{Fe}_{0.4}\text{Ni}_{0.6}\text{S}_2/\text{NC-DA}$ .

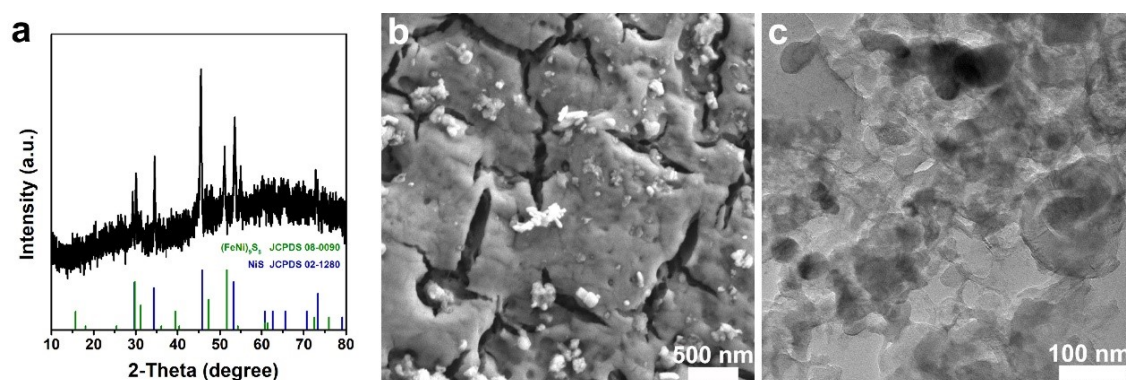

**Fig. S4.** a) XRD result, b) SEM and c) TEM image of  $\text{Fe}_{0.4}\text{Ni}_{0.6}\text{S}/\text{NC}$  NPs.

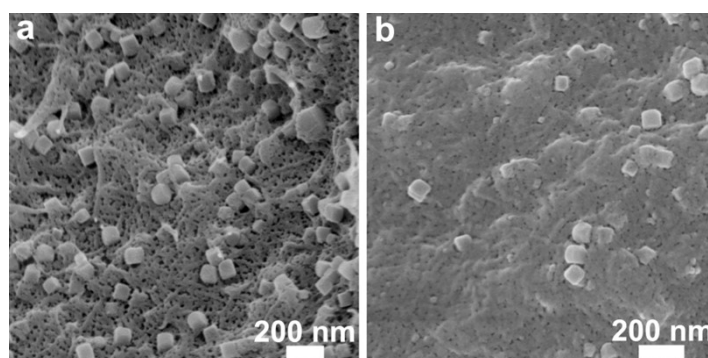

**Fig. S5.** SEM image of a) NiFe-PBA/CNFs film and b) NiFe-PBA/CNFs aggregates.

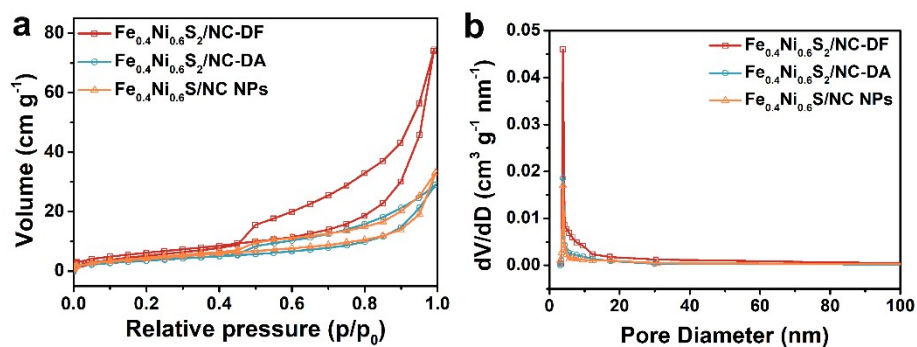

**Fig. S6.** a)  $\text{N}_2$  adsorption-desorption isotherm and b) the pore size distribution curve of  $\text{Fe}_{0.4}\text{Ni}_{0.6}\text{S}_2/\text{NC-DF}$ ,  $\text{Fe}_{0.4}\text{Ni}_{0.6}\text{S}_2/\text{NC-DA}$  and  $\text{Fe}_{0.4}\text{Ni}_{0.6}\text{S}/\text{NC}$  NPs.

**Table S2** Calculated values of OER electrocatalysts based on the fitted equivalent circuit in 1M KOH.

| Samples                                                 | $R_s$ ( $\Omega$ ) | $R_{ct}$ ( $\Omega$ ) |
|---------------------------------------------------------|--------------------|-----------------------|
| $\text{Fe}_{0.4}\text{Ni}_{0.6}\text{S}_2/\text{NC-DF}$ | 9.68               | 18.62                 |
| $\text{Fe}_{0.4}\text{Ni}_{0.6}\text{S}_2/\text{NC-DA}$ | 3.27               | 271.4                 |
| $\text{Fe}_{0.4}\text{Ni}_{0.6}\text{S}/\text{NC NPs}$  | 7.33               | 63.86                 |
| $\text{RuO}_2$                                          | 11.78              | 42.93                 |

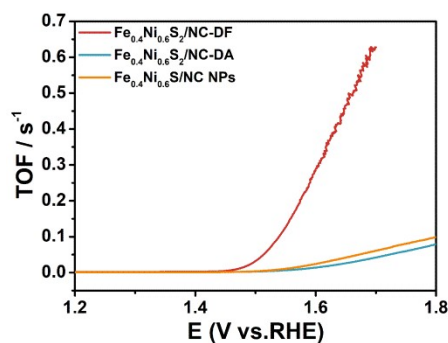

**Fig. S7.** TOF values of  $\text{Fe}_{0.4}\text{Ni}_{0.6}\text{S}_2/\text{NC-DF}$ ,  $\text{Fe}_{0.4}\text{Ni}_{0.6}\text{S}_2/\text{NC-DA}$  and  $\text{Fe}_{0.4}\text{Ni}_{0.6}\text{S}/\text{NC NPs}$  at different potentials.

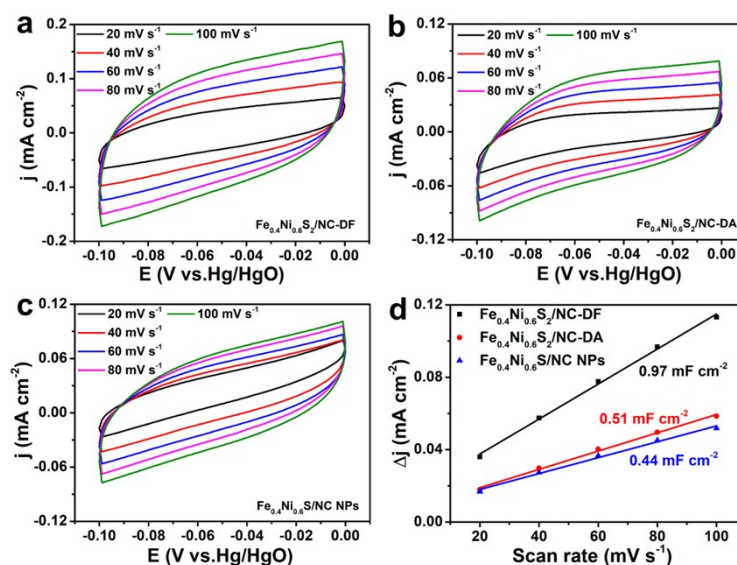

**Fig. S8.** CV curves of a)  $\text{Fe}_{0.4}\text{Ni}_{0.6}\text{S}_2/\text{NC-DF}$ , b)  $\text{Fe}_{0.4}\text{Ni}_{0.6}\text{S}_2/\text{NC-DA}$ , and c)  $\text{Fe}_{0.4}\text{Ni}_{0.6}\text{S}/\text{NC NPs}$  in the potential range of -0.1-0 V (vs. Hg/HgO) at scanning rate of 20, 40, 60, 80, and 100  $\text{mV s}^{-1}$ , and d) linear fitting curve of  $\Delta j = 1/2(j_a - j_c)$  at different scanning speeds at -0.05 V (vs. Hg/HgO)

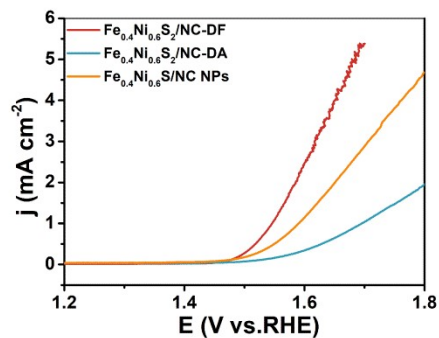

**Fig. S9.** The specific activity of  $\text{Fe}_{0.4}\text{Ni}_{0.6}\text{S}_2/\text{NC-DF}$ ,  $\text{Fe}_{0.4}\text{Ni}_{0.6}\text{S}_2/\text{NC-DA}$  and  $\text{Fe}_{0.4}\text{Ni}_{0.6}\text{S}/\text{NC NPs}$  normalized by ECSA.

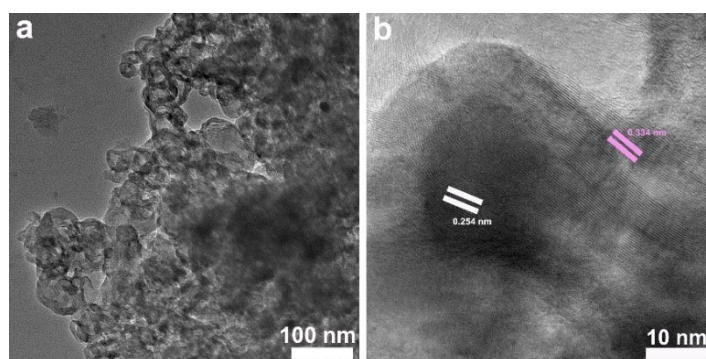

**Fig. S10** a) TEM and b) HRTEM image of  $\text{Fe}_{0.4}\text{Ni}_{0.6}\text{S}_2/\text{NC-DF}$  after stability.

**Table S3** Comparison of OER performances over nickel sulfide-based electrocatalysts in 1M KOH electrolyte recently reported in the literatures. ( $\eta_{\text{OER}}$  are the overpotentials of OER at specific current density)

| Catalysts                                                                 | $\eta_{\text{OER}}$<br>(mV) | Tafel<br>(mV<br>$\text{dec}^{-1}$ ) | Mass<br>loading<br>( $\text{mg cm}^{-2}$ ) | Substrate    | Ref.             |
|---------------------------------------------------------------------------|-----------------------------|-------------------------------------|--------------------------------------------|--------------|------------------|
| <b><math>\text{Fe}_{0.4}\text{Ni}_{0.6}\text{S}_2/\text{NC-DF}</math></b> | <b>282(10)</b>              | <b>59.7</b>                         | <b>0.2</b>                                 | <b>GC</b>    | <b>This work</b> |
| Fe-NiS <sub>2</sub> /MoS <sub>2</sub>                                     | 280(10)                     | 91.2                                | 0.25                                       | GC           | 1                |
| Fe-NiS                                                                    | 270(10)                     | 45.3                                | 0.40                                       | GC           | 2                |
| NiS/NiS <sub>2</sub>                                                      | 416(100)                    | 156.5                               | 2.4                                        | Carbon cloth | 3                |
| FeNi <sub>2</sub> S <sub>4</sub>                                          | 273(10)                     | 66                                  | 0.75                                       | Nickel foam  | 4                |
| MoS <sub>2</sub> /NiS <sub>2</sub>                                        | 278(10)                     | 91.7                                | NA                                         | Carbon cloth | 5                |
| NiS <sub>2</sub>                                                          | 375(10)                     | 138                                 | -                                          | Carbon cloth | 6                |
| N-CNTs@NiS <sub>2</sub> /Fe <sub>7</sub> S <sub>8</sub>                   | 330(50)                     | 51.49                               | 0.22                                       | GC           | 7                |
| (Ni,Fe)S <sub>2</sub> /NiFe(3:1)-CNFs                                     | 263(10)                     | 52                                  | 1.63                                       | GC           | 8                |

|                                    |         |      |      |              |    |
|------------------------------------|---------|------|------|--------------|----|
| N-doped carbon/NiS <sub>2</sub>    | 264(10) | 51.3 | 2.4  | Carbon cloth | 9  |
| FeS <sub>2</sub> /NiS <sub>2</sub> | 280(50) | 33   | 0.48 | Carbon paper | 10 |

## References

- 1 J Tian, X. Xing, Y Sun, X. Zhang, Z Li, M Yang and G Zhang, Strongly coupled Fe-doped NiS<sub>2</sub>/MoS<sub>2</sub> composite for high-efficiency water splitting, *Chem. Commun.*, 2022, **58**, 557-560.
- 2 X Huang, L Yu, X Wang and L Feng, Insights into Fe-doping effect induced heterostructure formation for oxygen evolution reaction, *Chem. Commun.*, 2023, **59**, 12294-12297.
- 3 Q. Li, D Wang, C. Han, X. Ma, Q Lu, Z Xing and X Yang, Construction of amorphous interface in an interwoven NiS/NiS<sub>2</sub> structure for enhanced overall water splitting, *J. Mater. Chem. A*, 2018, **6**, 8233-8237.
- 4 H. Wang, J Tang, Y Li, H. Chu, Y Ge, R Baines, P. Dong, P Ajayan, J Shen and M Ye, Template-free solvothermal preparation of ternary FeNi<sub>2</sub>S<sub>4</sub> hollow balloons as RuO<sub>2</sub>-like efficient electrocatalysts for the oxygen evolution reaction with superior stability, *J. Mater. Chem. A*, 2018, **6**, 19417-19424.
- 5 J Lin, P Wang, H Wang, C. Li, X Si, J Qi, J. Cao, Z Zhong, W Fei and J Feng, Defect-rich heterogeneous MoS<sub>2</sub>/NiS<sub>2</sub> nanosheets electrocatalysts for efficient overall water splitting, *Adv. Sci.*, 2019, **6**, 1900246.
- 6 X Zheng, X Han, Y Zhang, J Wang, C. Zhong, Y Deng and W Hu, Controllable synthesis of nickel sulfide nanocatalysts and their phase-dependent performance for overall water splitting, *Nanoscale*, 2019, **11**, 5646-5654.
- 7 J Wang, W Liu, X Li, T yang and Z Liu, Strong hydrophilicity NiS<sub>2</sub>/Fe<sub>7</sub>S<sub>8</sub> heterojunctions encapsulated in N-doped carbon nanotubes for enhanced oxygen evolution reaction, *Chem. Commun.*, 2020, **56**, 1489-1492.
- 8 M Zhong, N. Song, C Li, C. Wang, W. Chen and X Lu, Controllable growth of Fe-doped NiS<sub>2</sub> on NiFe-carbon nanofibers for boosting oxygen evolution reaction, *J. Colloid Interface Sci.*, 2022, **614**, 556-565.
- 9 D Zhang, H Mou, L. Chen, G. Xing, D Wang and C Song, Surface/interface engineering N-doped carbon/NiS<sub>2</sub> nanosheets for efficient electrocatalytic H<sub>2</sub>O splitting, *Nanoscale*, 2020, **12**, 3370-3376.
- 10 L. Wu, J Li, C. Shi, Y Li, H Mi, L Deng, Q Zhang, C He and X Ren, Rational design of the FeS<sub>2</sub>/NiS<sub>2</sub> heterojunction interface structure to enhance the oxygen electrocatalytic performance for zinc-air batteries, *J. Mater. Chem. A*, 2022, **10**, 16627-16638.
